# Supplementary material for: Self-assembled CoSe2–FeSe2 heteronanoparticles along the carbon nanotube network for boosted oxygen evolution reaction
Source: Royal Society of Chemistry journal article supplement (doi:10.1039/d1nr01092a), 2021-01-01
Supplement: d1nr01092a1.pdf [file d1nr01092a1.pdf]

## Supporting Information

### **Self-assembled CoSe<sub>2</sub>-FeSe<sub>2</sub> Heteronanoparticles along the Carbon Nanotubes Network for Boosted Oxygen Evolution Reaction**

Bin Wang<sup>a,§</sup>, Katam Srinivas<sup>a,§</sup>, Xinqiang Wang<sup>a</sup>, Bo Yu<sup>a</sup>, Xiaojuan zhang<sup>a</sup>, Zhe Su<sup>a</sup>, Yanfang Liu<sup>b</sup>, Fei Ma<sup>a</sup>, Dongxu Yang<sup>a</sup>, Yuanfu Chen<sup>a,b,\*</sup>

<sup>a</sup> School of Electronic Science and Engineering, and State Key Laboratory of Electronic Thin Films and Integrated Devices, University of Electronic Science and Technology of China, Chengdu 610054, PR China

<sup>b</sup> School of Science, and Institute of Oxygen Supply, Tibet University, Lhasa 850000, PR China

\*Corresponding author.

Email address: yfchen@uestc.edu.cn

Tel.: +86 028 83202710

## Synthesis of precursors

**Preparation of Co-Fe-PBA/CNT:** 1 mg/mL CNT pulp suspension was first prepared by ultrasonication (1 h) of 6 g multi-walled CNT paste in 300 mL of deionized water. Subsequently, 9 mmol cobalt(II) nitrate hexahydrate (2.62 g) and 13.5 mmol trisodium citrate dihydrate (3.97 g) were dissolved in a sequence to form solution **A**. Similarly, solution **B** was prepared by dissolving 6 mmol potassium hexacyanoferrate(II) (1.975 g) in 300 ml of deionized water. The as-prepared solution **B** was slowly added to solution **A** under continuous stirring at ambient temperature and the resulting mixture was allowed stir for additional 15 minutes. Thereafter, the attained mixed suspension was aged for 24 h at room temperature and then collected by centrifugation by washing with DI water and ethanol several times. The resulting sample was dried at 65 °C overnight and denoted as Co-Fe-PBA/CNT. Similar, methodology was used in fabricating Co-Co-PBA/CNT only by replacing potassium hexacyanoferrate(II) with Potassium hexacyanocobaltate(II). Similarly, Fe-Fe-PBA/CNT was prepared by replacing cobalt(II) nitrate hexahydrate with ferric nitrate(III) nonahydrate.

**Preparation of Co-Fe-PBA-Se/CNT:** 0.2 g of Co-Fe-PBA/CNT was dispersed in 60 ml ethylene glycol and allowed to stir at room temperature (30 min) in order to obtain a homogenous suspension. Then, controlled amounts of sodium selenite (1.13 g) was added into the homogenous suspension and stirred for additional 30 min. The resulting suspension was transferred into a three-neck flask and subjected to microwave assisted heating (120 °C) for 45 minutes. After cooling down naturally, the as-obtained precipitate was collected by centrifugation by washing with methanol and ethanol alternatively for several times. The resulting product was dried at 65 °C overnight and denoted as Co-Fe-PBA-Se/CNT.

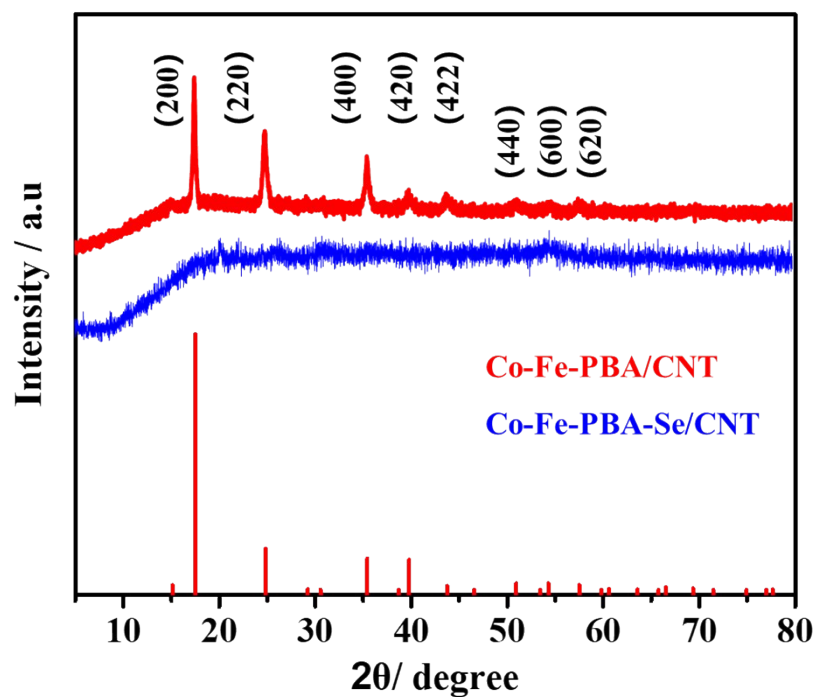

**Fig. S1** XRD pattern of Co-Fe-PBA/CNT and Co-Fe-PBA-Se/CNT.

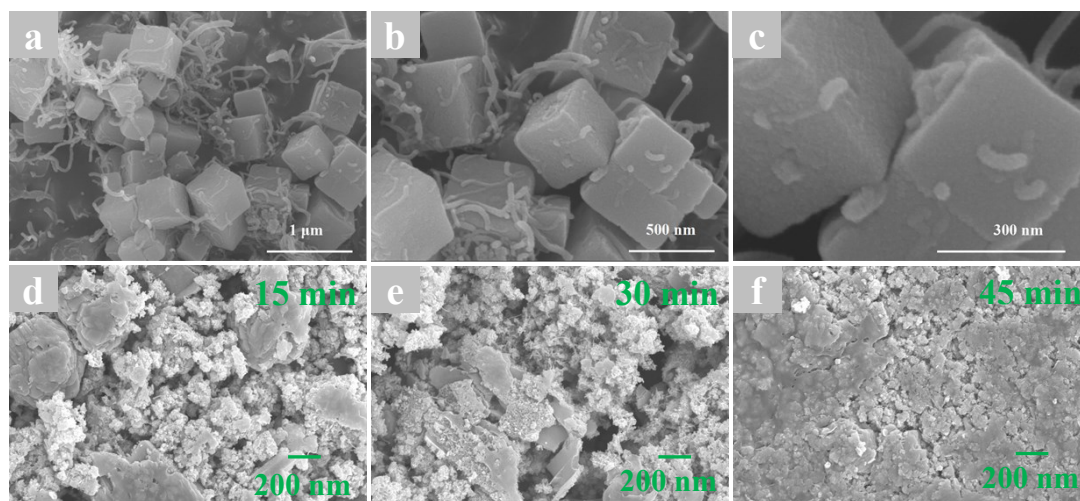

**Fig. S2** SEM image of Co-Fe-PBA/CNT (a-c), Co-Fe-PBA-Se/CNT (d-f) with different reaction time (15, 30 and 45 min, respectively).

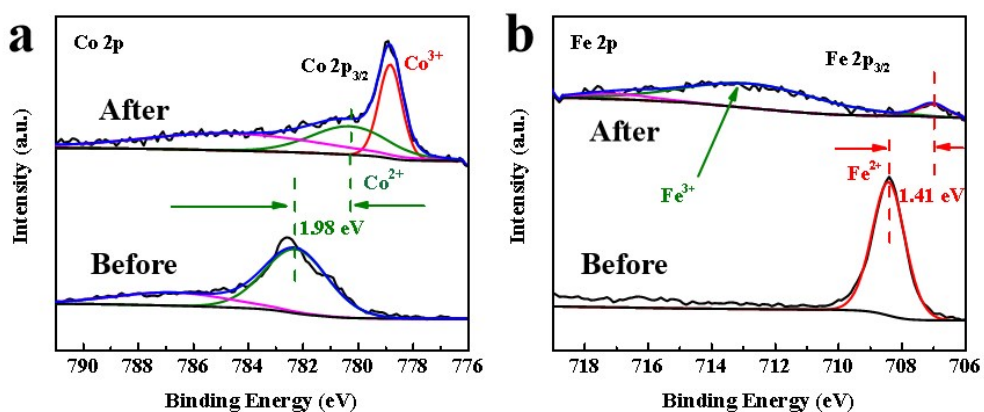

**Fig. S3** The high-resolution Co 2p (a), and Fe 2p (b) core-level XPS spectra of Co-Fe-PBA/CNT (**Before**) and Co-Fe-PBA-Se/CNT (**After**).

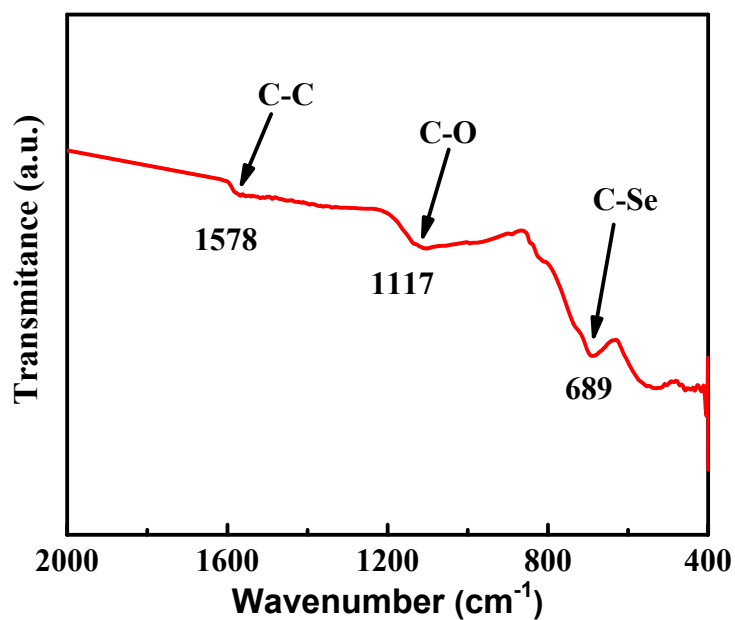

**Fig. S4** FTIR spectrum of CoSe<sub>2</sub>-FeSe<sub>2</sub>/CNT.

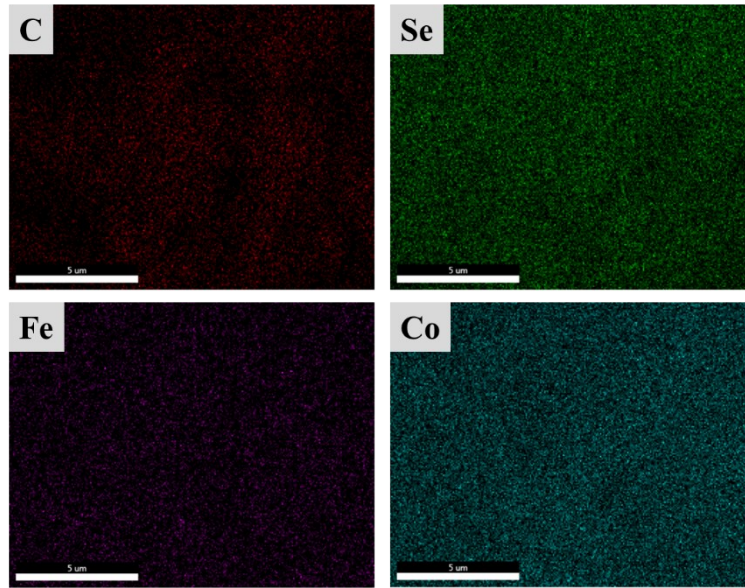

**Fig. S5** SEM mapping of element C, Se, Fe and Co in CoSe<sub>2</sub>-FeSe<sub>2</sub>/CNT.

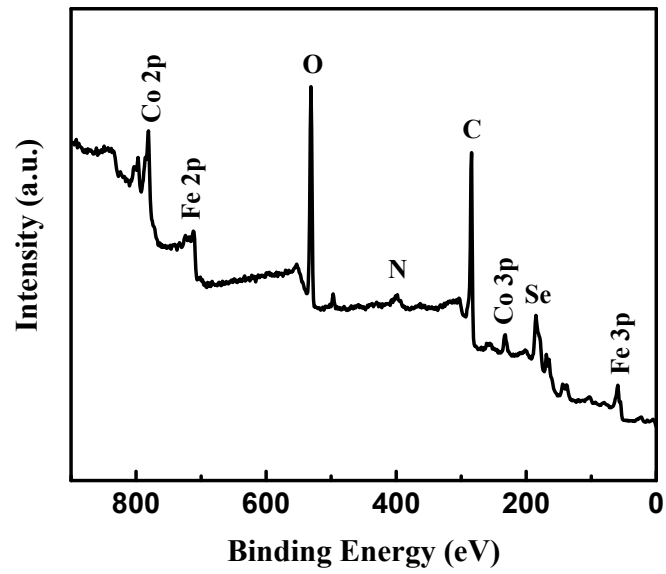

**Fig. S6** XPS survey scan of CoSe<sub>2</sub>-FeSe<sub>2</sub>/CNT.

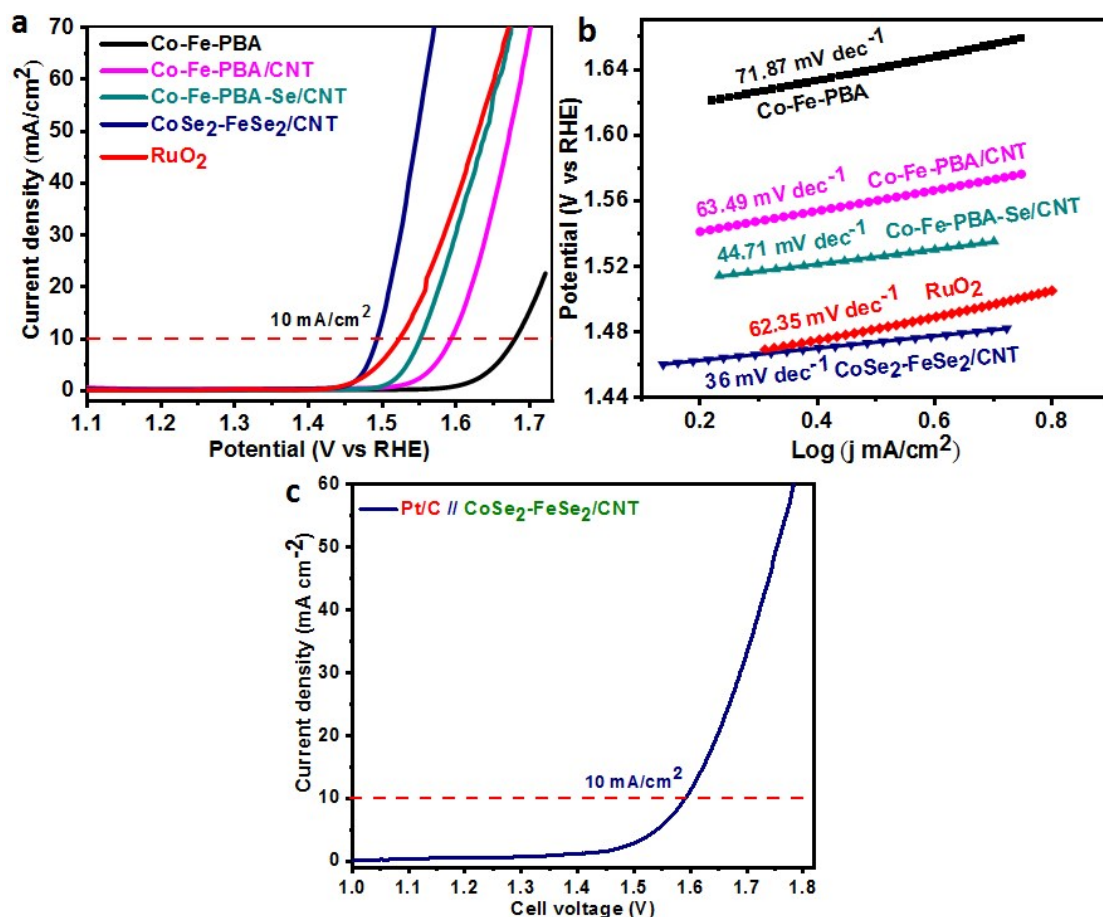

**Fig. S7** LSV curves and corresponding Tafel plots of Co-Fe-PBA, Co-Fe-PBA/CNT, Co-Fe-PBA-Se/CNT, CoSe<sub>2</sub>-FeSe<sub>2</sub>/CNT and commercial RuO<sub>2</sub> electrocatalysts in 1.0 M KOH electrolyte (a,b), and overall water-splitting ability of CoSe<sub>2</sub>-FeSe<sub>2</sub>/CNT (anode) with state-of-the-art Pt/C (cathode) (c).

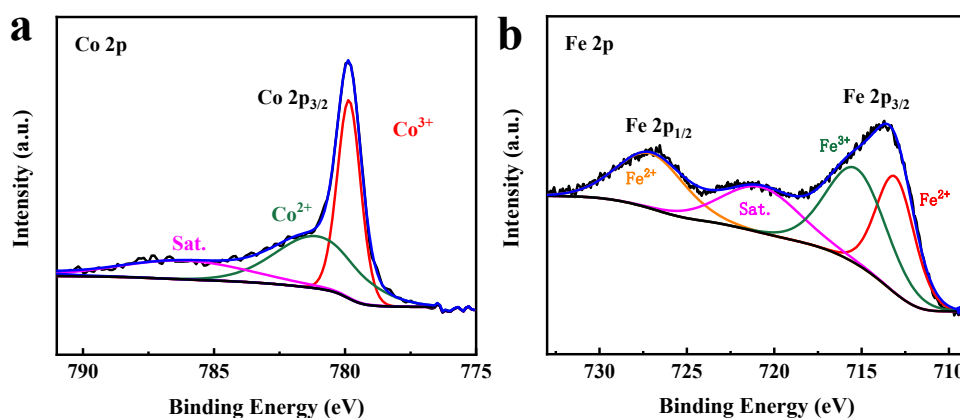

**Fig. S8** Core-level XPS spectra of Co 2p (a), and Fe 2p (b) for the CoSe<sub>2</sub>/CNT and FeSe<sub>2</sub>/CNT samples, respectively.

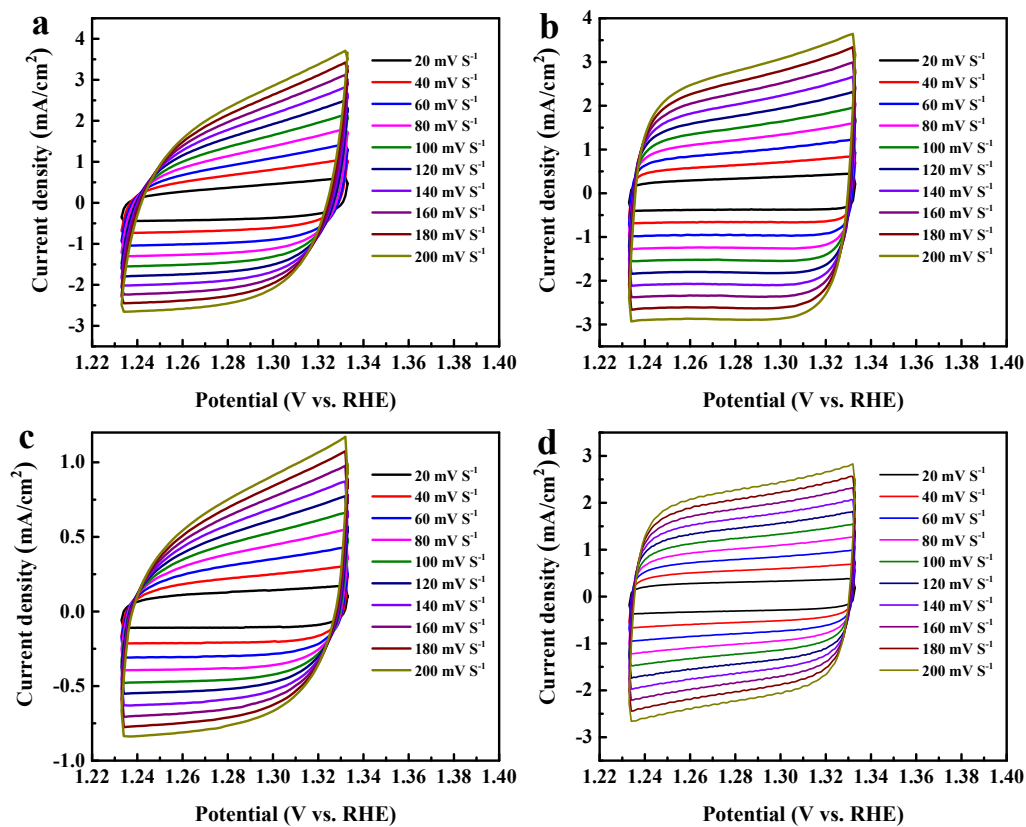

**Fig. S9** Voltammograms of CoSe<sub>2</sub>/CNT (a), FeSe<sub>2</sub>/CNT (b), CoSe<sub>2</sub>-FeSe<sub>2</sub>/CNT (c) and CoSe<sub>2</sub>-FeSe<sub>2</sub>/CNT (d) for OER in alkaline electrolyte.



**Calculation of Faradaic Efficiency:** In general, the amount of oxygen (O<sub>2</sub>) evolved can be estimated from the obtained gas volume in a water-drainage set-up by applying the ideal gas law. While, the theoretical quantity of O<sub>2</sub> can be calculated through Faraday law based on the fixed current. Therefore, by using this data one can evaluate the Faradic efficiency by the following equation;

$$\text{Faradaic Efficiency} = \frac{V/V_m}{n_{O_2}} \times 100 \quad \dots\dots\dots S_1$$

Where, ‘V’ is the volume of gas experimentally evolved during the reaction, ‘V<sub>m</sub>’ is the molar volume (22.4 L mol<sup>-1</sup>, at STP) and ‘n<sub>O<sub>2</sub></sub>’ is the theoretical number of moles of O<sub>2</sub> produced.

The theoretical number of moles of O<sub>2</sub> evolved can be obtained by the following equation;

$$n_{O_2} = \frac{Q}{nF} \quad \dots\dots\dots S_2$$

Where, ‘Q’ is the total quantity of electric charge (C), ‘F’ is the Faradaic constant (96485 C mol<sup>-1</sup>), and ‘n’ is the number of electrons transferred during the process (OER; 4 moles of electrons per mole of O<sub>2</sub>)

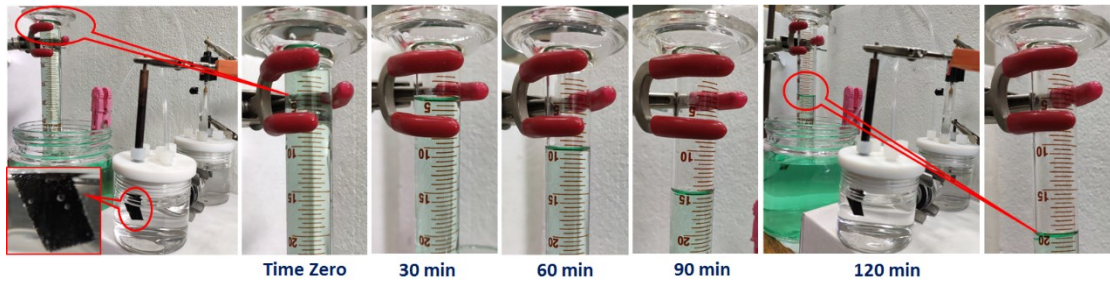

**Fig. S10** Water oxidation process of the electrolyzer derived from CoSe<sub>2</sub>-FeSe<sub>2</sub>/CNT material in 1.0 M KOH at a constant current density of 50 mA cm<sup>-2</sup> for 2 h (photographs of lab-made gas collectors at the beginning (Time = Zero minutes) and up to 2 h with 30 minutes interval).



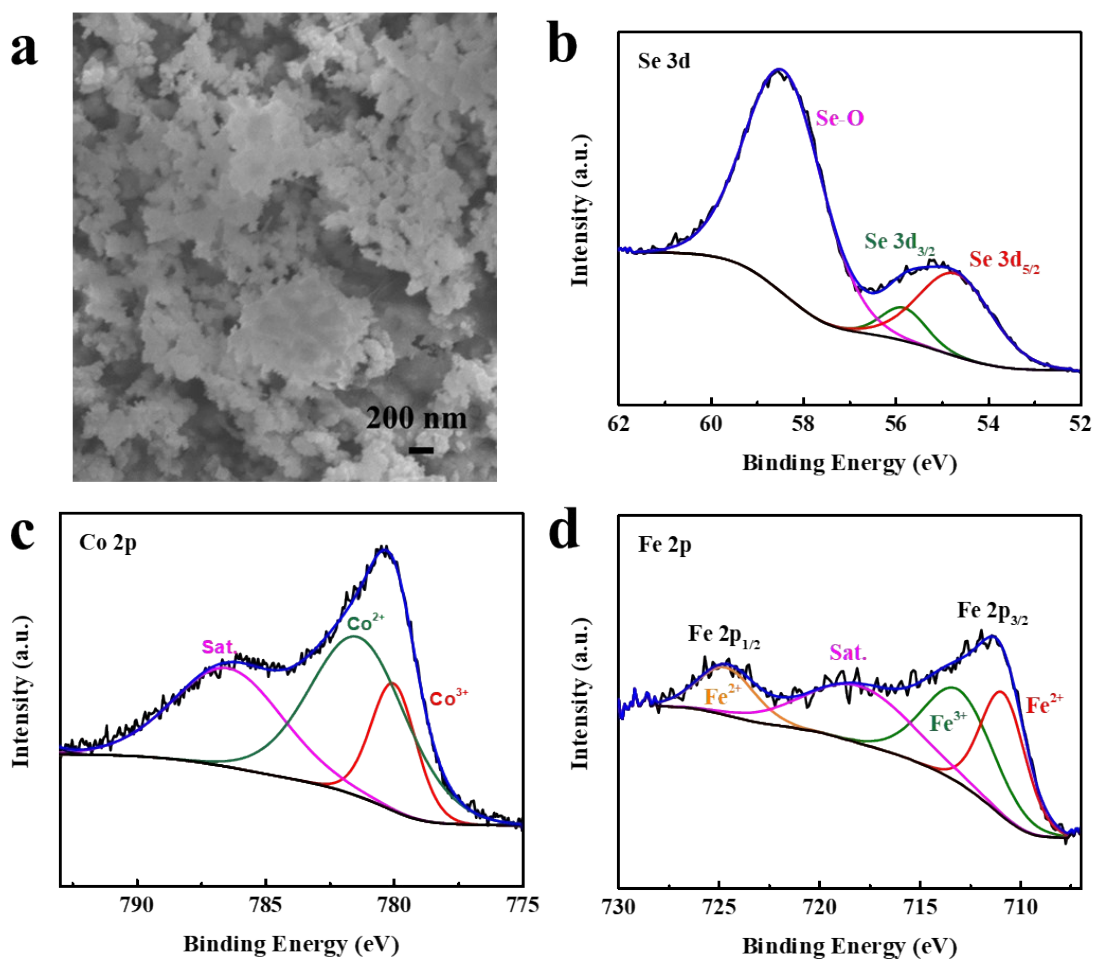

**Fig. S11** The SEM image (a), detailed Se 3d (b), Co 2p (c), and Fe 2p (d) XPS core-level spectra of CoSe<sub>2</sub>-FeSe<sub>2</sub>/CNT after 20 h *i-t* test in 1.0 M KOH electrolyte.

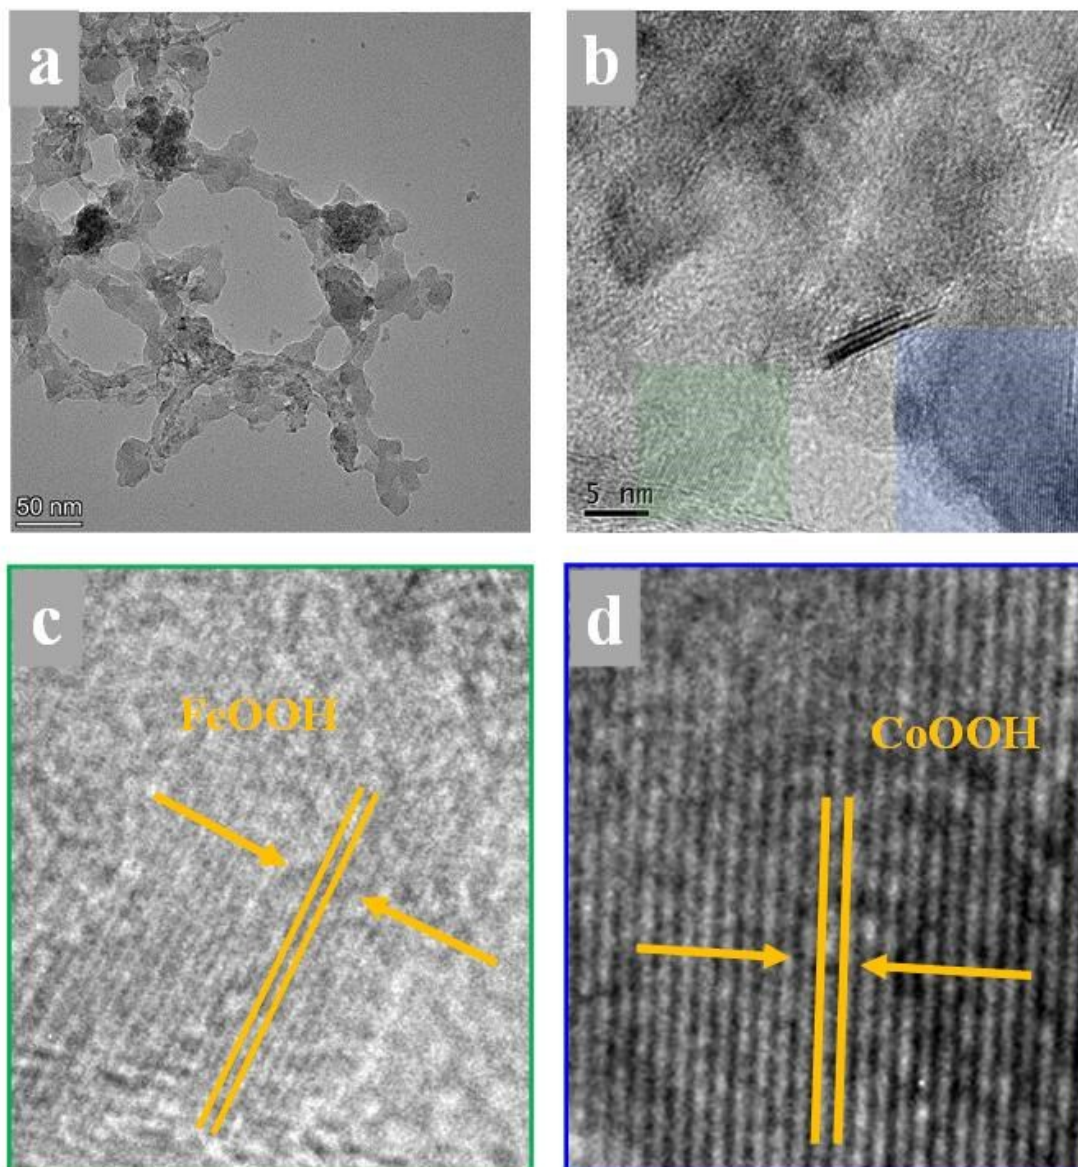

**Fig. S12** TEM (a), HRTEM images of CoSe<sub>2</sub>-FeSe<sub>2</sub>/CNT after the chronoamperometry test (b-d).

**Table S1.** Comparative overpotential and Tafel slope values of TMDs materials fabricated recently with CoSe<sub>2</sub>-FeSe<sub>2</sub>/CNT.

| <b>Materials</b>                                   | <b><math>\eta</math> mV@10 mA/cm<sup>2</sup></b> | <b>Tafel slope (mV/ dec)</b> | <b>(<i>i-t</i>) (h)</b> | <b>Ref.</b>      |
|----------------------------------------------------|--------------------------------------------------|------------------------------|-------------------------|------------------|
| <b>CoSe<sub>2</sub>-FeSe<sub>2</sub>/CNT</b>       | <b>248 (OER)</b><br><b>1.59 V (OWS)</b>          | <b>36.0</b>                  | <b>20</b>               | <b>This work</b> |
| CoSe <sub>2</sub> /FeSe <sub>2</sub> @C            | 291                                              | 62.0                         | ~25                     | <b>1</b>         |
| CoSe@FeSe <sub>2</sub>                             | 281                                              | 34.3                         | 12                      | <b>2</b>         |
| FeSe <sub>2</sub> @CoSe <sub>2</sub> /rGO          | 260                                              | 38.2                         | 6                       | <b>3</b>         |
| CoSe <sub>2</sub> /FeSe <sub>2</sub> DS-HNCs       | 240                                              | 44                           | 50                      | <b>4</b>         |
| CoSe <sub>2</sub>                                  | 320                                              | 40.1                         | 15                      | <b>5</b>         |
| Co <sub>0.75</sub> Fe <sub>0.25</sub> -Se/NF       | 246                                              | 41.4                         | 40                      | <b>6</b>         |
| FeCoMo-Se                                          | 264                                              | 33                           | 100                     | <b>7</b>         |
| O-CoSe <sub>2</sub> -HNT                           | 252                                              | 62                           | 35                      | <b>8</b>         |
| CoSe <sub>2</sub> @NC                              | 310                                              | 59                           | -                       | <b>9</b>         |
| FeCoSe <sub>2</sub> /Co <sub>0.85</sub> Se         | 330                                              | 50.8                         | 12                      | <b>10</b>        |
| (Ni,Co)Se <sub>2</sub>                             | 278                                              | 65                           | 20                      | <b>11</b>        |
| Co <sub>3</sub> Se <sub>4</sub> /FeSe <sub>2</sub> | 280                                              | 51                           | 24                      | <b>12</b>        |

C = carbon nanorod; DS-HNCs = double-shelled hollow nanocuboids; rGO = reduced Graphene Oxide; NF = Nickel Foam; O- = Oxygen rich; HNT = hierarchical nanotubes; NC = N-Doped-carbon.

**Table S2.** The comparison of the XPS characteristic peaks of CoSe<sub>2</sub>-FeSe<sub>2</sub>/CNT, CoSe<sub>2</sub>/CNT and FeSe<sub>2</sub>/CNT.

| CoSe <sub>2</sub> -FeSe <sub>2</sub> /CNT |                  | CoSe <sub>2</sub> -FeSe <sub>2</sub> /CNT |                  |
|-------------------------------------------|------------------|-------------------------------------------|------------------|
| 778.91                                    | 781.39           | 713.58                                    | 716.61           |
| Co-Se                                     | Co <sup>2+</sup> | Fe <sup>2+</sup>                          | Fe <sup>3+</sup> |
| 779.84                                    | 781.60           | 713.20                                    | 715.56           |
| CoSe <sub>2</sub> /CNT                    |                  | FeSe <sub>2</sub> /CNT                    |                  |

Note: the values in the table are unified in eV.

#### References:

1. W. Li, Y. Niu, X. Wu, F. Wu, T. Li, and W. Hu, Heterostructured CoSe<sub>2</sub>/FeSe<sub>2</sub> Nanoparticles with Abundant Vacancies and Strong Electronic Coupling Supported on Carbon Nanorods for Oxygen Evolution Electrocatalysis, *ACS Sustainable Chem. Eng.* 8 (2020) 4658–4666.
2. Y. Zhang, J. Xu, L. Lv, A. Wang, B. Zhang, Electronic engineering of CoSe/FeSe<sub>2</sub> hollow nanospheres for efficient water oxidation, *Nanoscale.* 12 (2020) 10196–10204. doi:10.1039/d0nr01809k.
3. G. Zhu, X. Xie, X. Li, Y. Liu, X. Shen, K. Xu, Nanocomposites Based on CoSe<sub>2</sub>-Decorated FeSe<sub>2</sub> Nanoparticles Supported on Reduced Graphene Oxide as High-Performance Electrocatalysts toward Oxygen Evolution Reaction, *ACS Appl. Mater. Interfaces* 10 (2018) 19258–19270.
4. C. Xu, Q. Li, J. Shen, Z. Yuan, J. Ning, Y. Zhong, et al., A facile sequential ion exchange strategy to synthesize CoSe<sub>2</sub>/FeSe<sub>2</sub> double-shelled hollow nanocuboids for the highly active and stable oxygen evolution reaction, *Nano Res.* 11 (2019) 10738–10745. doi:10.1039/c9nr02599e.
5. C. Zhang, B. Tang, X. Gu, L. Feng, Surface chemical state evaluation of CoSe<sub>2</sub> catalysts for the oxygen evolution reaction, *Chem. Commun.* 55 (2019) 10928–10931.

6. K. Guo, Z. Zou, J. Du, Y. Zhao, B. Zhou, C. Xu, Coupling FeSe<sub>2</sub> with CoSe: an effective strategy to create stable and efficient electrocatalysts for water oxidation, *Chem. Commun.* 54 (2018) 11140–11143. doi:10.1039/c8cc06628k.
7. Y. -J.Tang, Y. Wang, K. Zhou, In situ oxidation transformation of trimetallic sacrificing MoSe<sub>2</sub> for efficient water oxidation, *J. Mater. Chem. A* 8 (2020) 7925–7934.
8. B. Jia, Z. Xue, Q. Liu, Q. Liu, K. Liu, M. Liu, Hierarchical nanotubes constructed from CoSe<sub>2</sub> nanorods with an oxygen-rich surface for an efficient oxygen evolution reaction, *J. Mater. Chem. A.* 7 (2019) 15073–15078. doi:10.1039/c9ta03606g.
9. J. Lu, S.Wang, C. Ding, W. Lv, Y. Zeng, N. Liu, H. Wang, Q. Meng, Q. Liu, Metal organic frameworks derived CoSe<sub>2</sub>@N-Doped-carbon-nanorods as highly efficient electrocatalysts for oxygen evolution reaction, *J. Alloys Compd.* 778 (2019) 134–140.
10. K. Zhang, M. Shi, Y. Wu, C. Wang, Constructing FeCoSe<sub>2</sub>/Co<sub>0.85</sub>Se heterostructure catalysts for efficient oxygen evolution, *J. Alloy. Compd. Alloy.* 825 (2020) 154073. doi:10.1016/j.jallcom.2020.154073.
11. W. Shen, X. Guo, J. Sun, S. Xu, J. Xu, Prussian blue analogues derived binary nickel-cobalt selenide for enhanced pseudocapacitance and oxygen evolution reaction, *Vacuum.* 170 (2019) 108965. doi:10.1016/j.vacuum.2019.108965.
12. J. Wan, W. Ye, R. Gao, X. Fang, Z. Guo, Y. Lu, D. Yan, Synthesis from a layered double hydroxide precursor for a highly efficient oxygen evolution. *Inorg. Chem. Front.* 2019, 6, 1793–1798.
